# Supplementary material
Source: Springer Nature journal article supplement (https://www.springermedizin.de/resource/supplementary/40478_2013_18_MOESM6_ESM.pdf/25658100)
Supplement: MOESM6 [file 25658100]

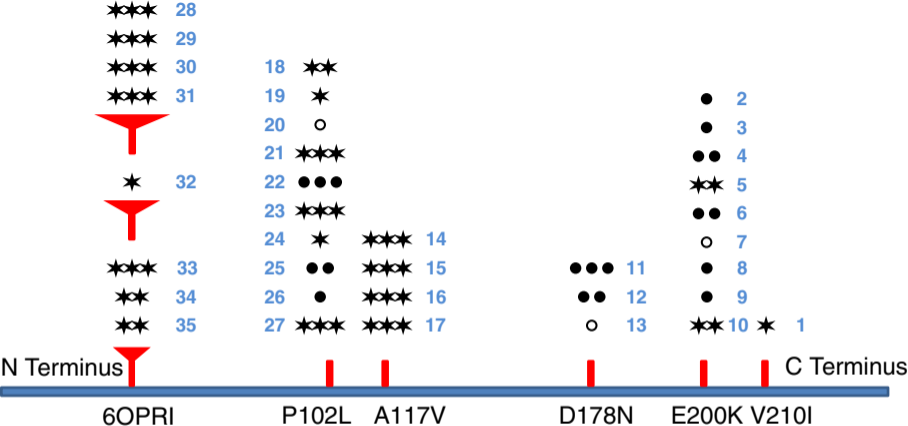

- ★ White matter threads
- White matter dot like deposits
- No white matter deposits

- Point mutations
- OPRI (Octapeptide repeat insert)

1-35 Case number (see Table 1)
